# Supplementary material
Source: PubMed Central journal article supplement (PMC2965957)
Supplement: mmc7.pdf [file mmc7.pdf]

## SUPPEMENTAL MATERIAL

Kandice Tanner, Aaron Boudreau, Mina J. Bissell, and Sanjay Kumar.  
Dissecting regional variations in stress fiber mechanics in living cells with laser nanosurgery.  
*Biophysical Journal* submission BIOPHYSJ/2010/178590

### SUPPLEMENTAL FIGURE LEGENDS

**Figure S1.** Regional control of stress fibers by ROCK (additional examples). Immunofluorescence imaging of fixed U87MG cels showing F-actin (green, left column), MLC (red, middle column), and regions of colocalization (yellow, right column). Solid bar = 10  $\mu\text{m}$ .

**Figure S2.** Regional control of stress fibers by MLCK (additional examples). Immunofluorescence imaging of fixed U87 MG showing F-actin (green, left column), MLC (red, middle column), and regions of colocalization (yellow, right column). Solid bar = 10  $\mu\text{m}$ .

**Figure S3.** Selective photodisruption and viscoelastic recoil of central stress fibers (additional examples). Solid Bar = 10  $\mu\text{m}$  .

**Figure S4.** Selective photodisruption and viscoelastic recoil of peripheral stress fibers (additional examples). Solid Bar = 10  $\mu\text{m}$ .

**Figure S5.** Representative images of area changes due to photodisruption of central and peripheral stress fibers (additional examples). Solid Bar = 10  $\mu\text{m}$ .

**Figure S6.** Plot of Area vs. Time following photodisruption of central and peripheral stress fibers.

### SUPPLEMENTAL MOVIE LEGENDS

**Movie S1. Loss of central fibers induced by ROCK inhibition.** Effect of ROCK inhibition on U87MG glioblastoma cells visualized with real-time fluorescence microscopy acquired at a rate of 0.5 frames/min in the 90 min. after addition of Y27632. Playback rate is 30X the rate of acquisition.

**Movie S2. Loss of peripheral fibers induced by MLCK inhibition.** Effect of MLCK inhibition on U87MG glioblastoma cells visualized with real time fluorescence microscopy acquired at a rate of 0.5 frames/min in the 90 min. after addition of ML7. Playback rate is 30X the rate of acquisition.

**Movie S3. Bleb induced by laser ablation of plasma membrane.** Membrane blebbing following disruption of plasma membrane acquired at a rate of 1 frame/s for a total of 1min. following photodsirruption. Playback rate is 30X the rate of acquisition.

**Movie S4. Viscoelastic recoil of a severed central fiber.** Photodisruption and viscoelastic retraction of an individual central stress fiber acquired at a rate of 1 frame/s for a total of 30 minutes. Playback rate is 30X the rate of acquisition.

**Movie S5. Viscoelastic recoil of a severed peripheral fiber.** Photodisruption and viscoelastic retraction of an individual peripheral stress fiber acquired at a rate of 1 frame/s for a total of 10 min. Playback rate is 30X the rate of acquisition.

**Movie S6. Re-assembly of a severed stress fiber.** Re-formation of a peripheral stress fiber at long time scales following photoablation acquired at a rate of 1 frame/s for a total of 30 min. Playback rate is 10X the rate of acquisition.

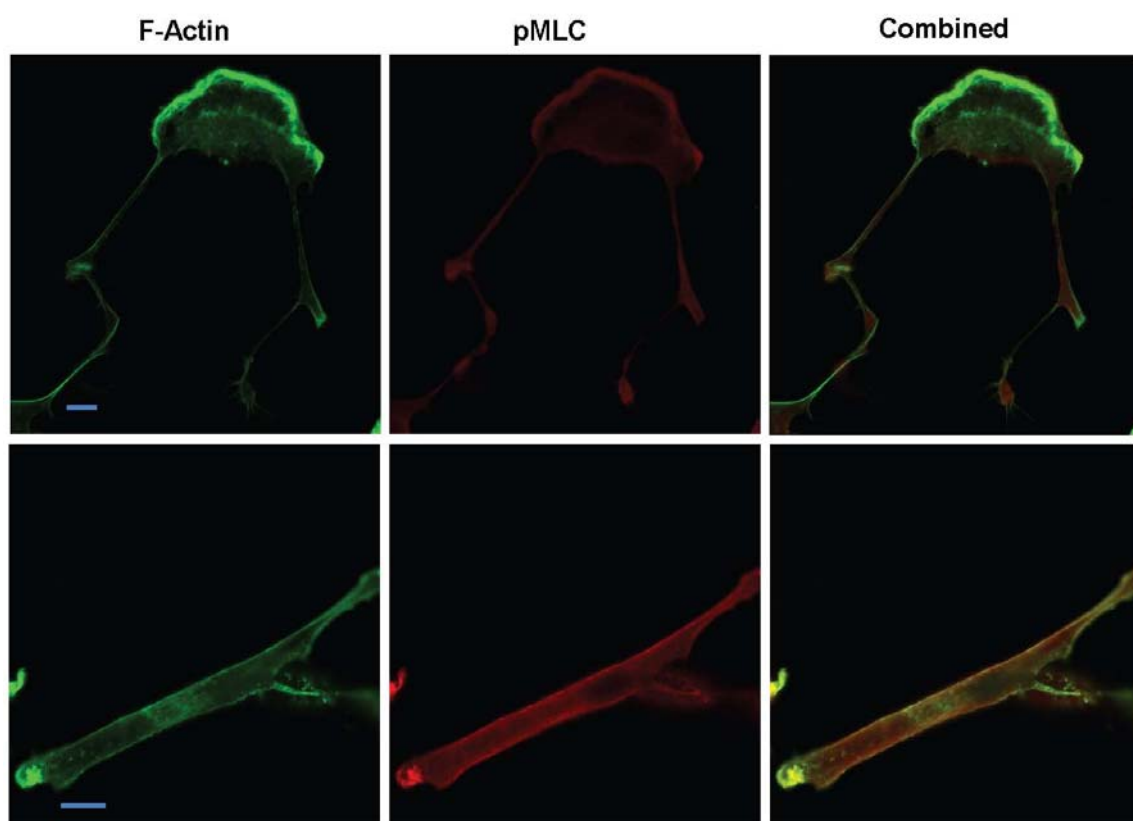

Figure S1

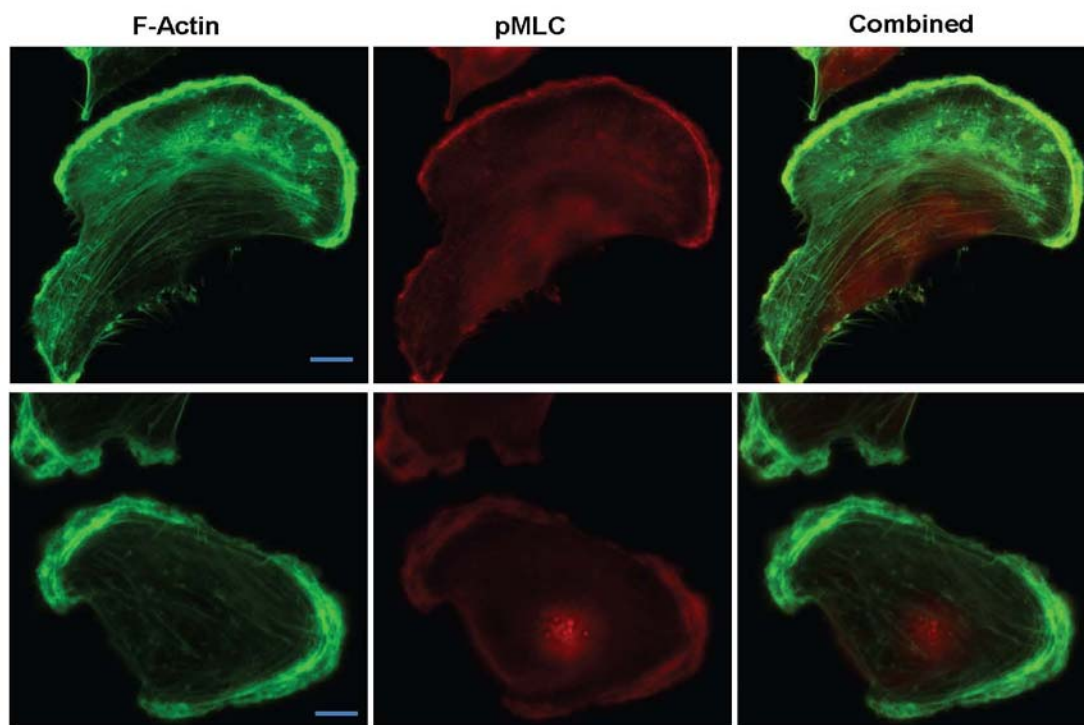

Figure S2

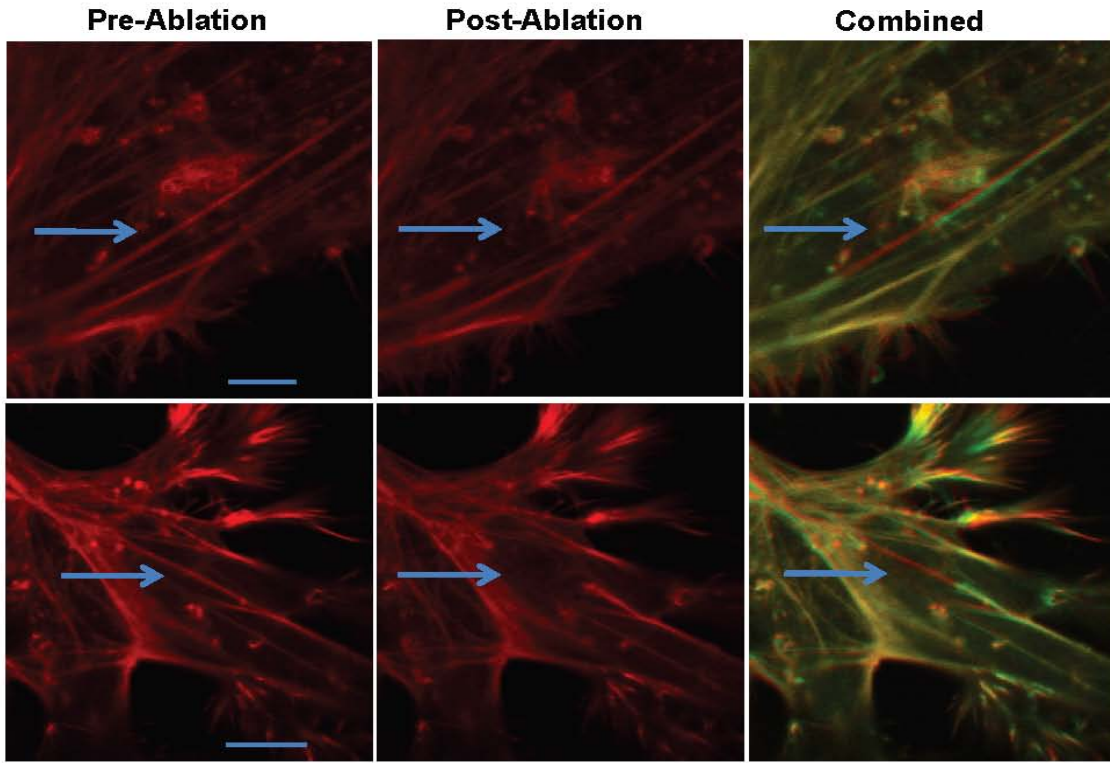

Figure S3

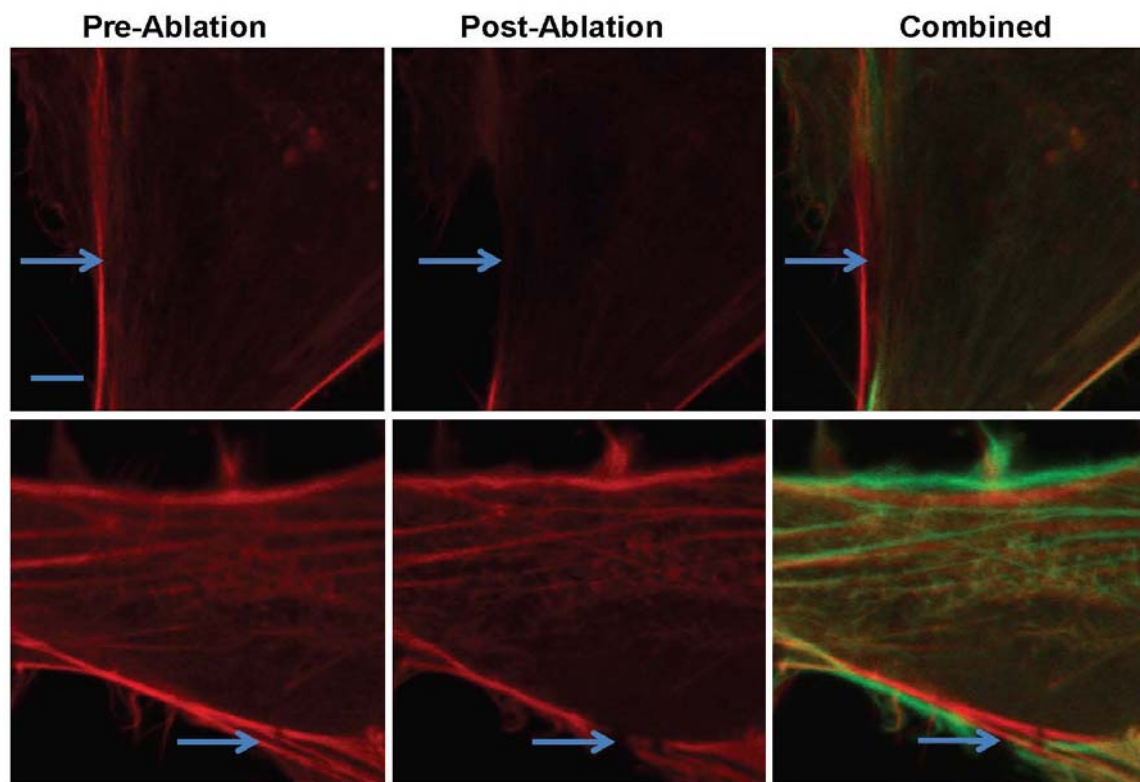

Figure S4

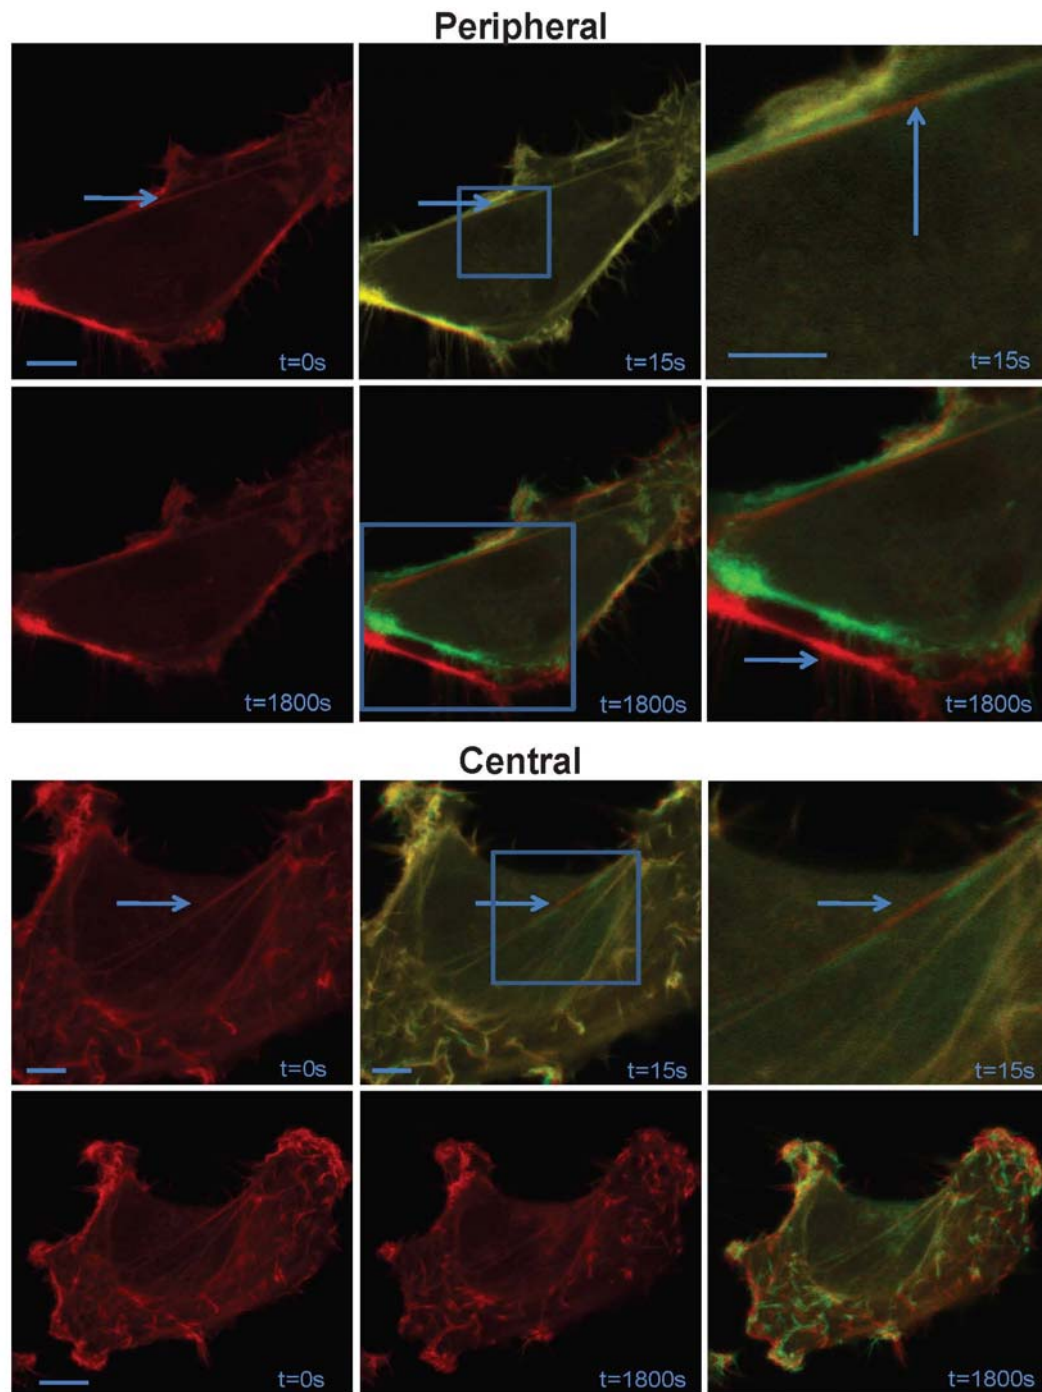

Figure S5

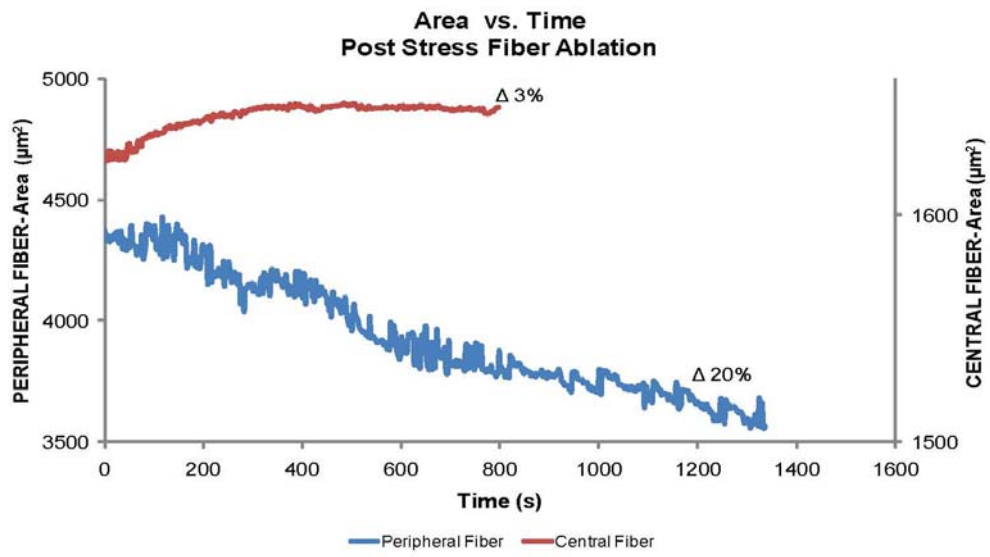

Figure S6
